# Supplementary material for: Parasite-insecticide interactions: a case study of Nosema ceranae and fipronil synergy on honeybee
Source: PubMed Central journal article supplement — Sci Rep. 2012 Mar 22;2:326. doi: 10.1038/srep00326 (PMC3310228; doi:10.1038/srep00326), 2012-03-22
Supplement: srep00326-s1.pdf [file srep00326-s1.pdf]

## **Supplementary Information File**

### **Parasite-insecticide interactions: a case study of *Nosema ceranae* and fipronil synergy on honeybee**

Julie Aufauvre<sup>1,2</sup>, David G. Biron<sup>1,2</sup>, Cyril Vidau<sup>1,2</sup>, Régis Fontbonne<sup>1,2</sup>, Mathieu Roudel<sup>1,2</sup>, Marie Diogon<sup>1,2</sup>, Bernard Viguès<sup>1,2</sup>, Luc P. Belzunces<sup>3</sup>, Frédéric Delbac<sup>1,2</sup> & Nicolas Blot<sup>1,2\*</sup>

<sup>1</sup>Clermont Université, Université Blaise Pascal, Laboratoire "Microorganismes : Génome et Environnement", BP 10448, 63000 Clermont-Ferrand, France, <sup>2</sup>CNRS, UMR 6023, LMGE, 63177 Aubière, France, <sup>3</sup>INRA, UMR 406 Abeilles & Environnement, Laboratoire de Toxicologie Environnementale, Site Agroparc, Avignon, France.

**Supplementary Table S1. Pairwise comparisons evaluating the susceptibility of honeybees to *Nosema ceranae* (Nc) and Fipronil (F) treatments applied alone or in combination.** The given p-values are results of “cumulative survival proportions” pairwise comparisons using a Kaplan-Meier test. All differences are significant at  $p \leq 0.05$ .

**a** Exposure day 0 Nc+F  
Exposure day 7 -

| <b>Variables</b> | <b>p-value</b> |
|------------------|----------------|
| Nc+F vs. Control | <u>0.00000</u> |
| Nc+F vs. F       | <u>0.00000</u> |
| Nc+F vs. Nc      | <u>0.00000</u> |

**b** Exposure day 0 F  
Exposure day 7 Nc

| <b>Variables</b> | <b>p-value</b> |
|------------------|----------------|
| Nc+F vs. Control | <u>0.00000</u> |
| Nc+F vs. F       | <u>0.00001</u> |
| Nc+F vs. Nc      | <u>0.00000</u> |

**c** Exposure day 0 Nc  
Exposure day 7 F

| <b>Variables</b> | <b>p-value</b> |
|------------------|----------------|
| Nc+F vs. Control | <u>0.00000</u> |
| Nc+F vs. F       | <u>0.00000</u> |
| Nc+F vs. Nc      | <u>0.00000</u> |

**d** Exposure day 0 -  
Exposure day 7 Nc+F

| <b>Variables</b> | <b>p-value</b> |
|------------------|----------------|
| Nc+F vs. Control | <u>0.00000</u> |
| Nc+F vs. F       | <u>0.00000</u> |
| Nc+F vs. Nc      | <u>0.00000</u> |
